# Supplementary material for: Recycling Compatible Organic Electrode Materials Containing Amide Bonds for Use in Rechargeable Batteries
Source: MDPI journal article supplement (doi:10.3390/polym15224395), 2023-11-13
Supplement: s1 [file s1]

*Supporting Information*

**Recycling Compatible Organic Electrode Materials  
Containing Amide Bonds for Use in Rechargeable Batteries**

Masaru Yao \*, Hikaru Sano, and Hisanori Ando

Research Institute of Electrochemical Energy, Department of Energy and Environment,  
National Institute of Advanced Industrial Science and Technology (AIST), 1-8-31  
Midorigaoka, Ikeda, Osaka 563-8577, Japan

\* Correspondence: [m.yao@aist.go.jp](mailto:m.yao@aist.go.jp)

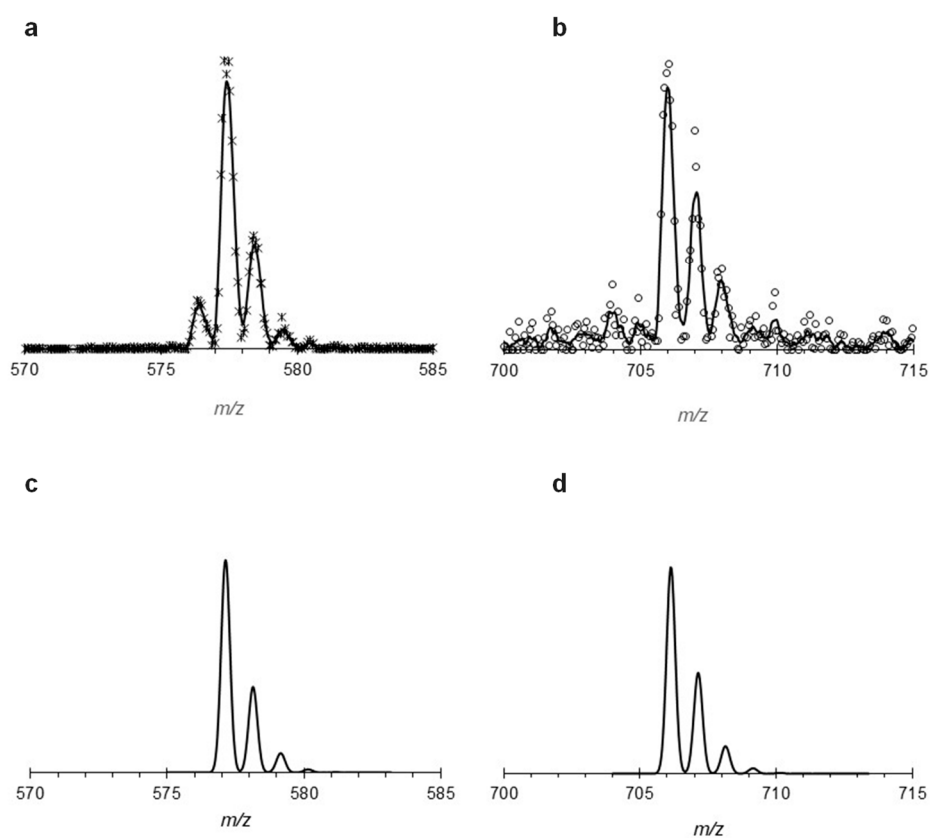

**Figure S1.** Mass spectra of the (a) amide-bonded dimer and (b) amide-bonded trimer along with (c,d) their simulated patterns considering the isotope abundance ratios.

**a**

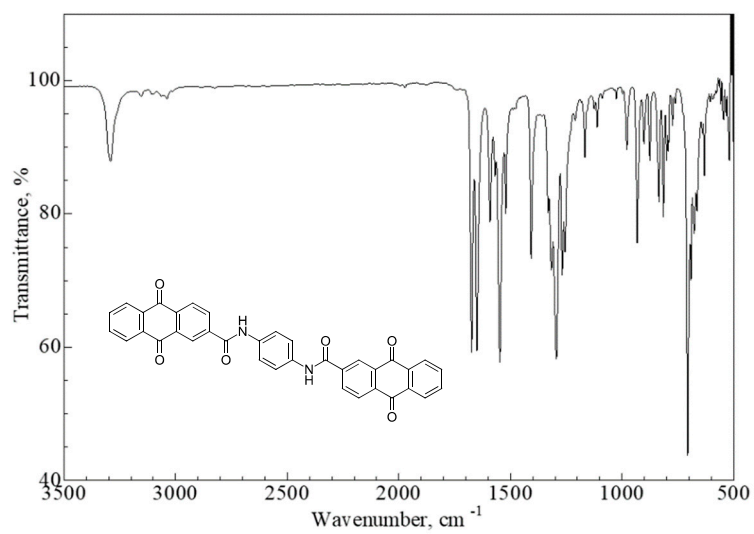

**b**

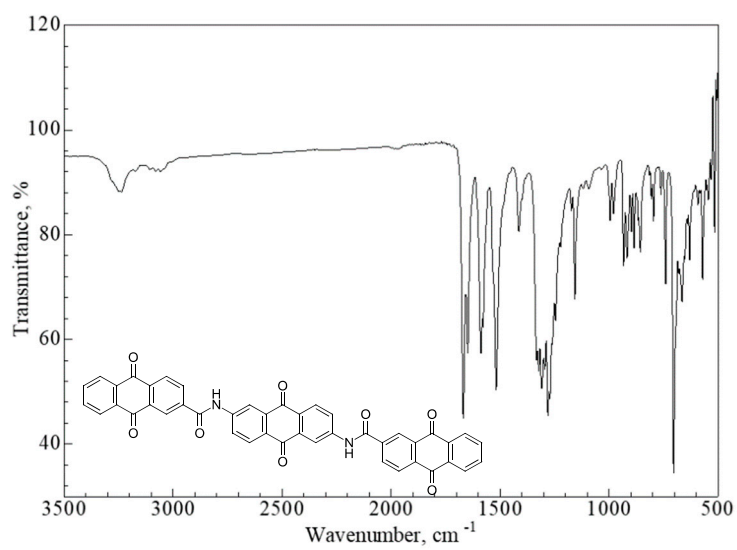

**Figure S2.** IR spectra of the (a) amide-bonded dimer and (b) amide-bonded trimer.

**a**

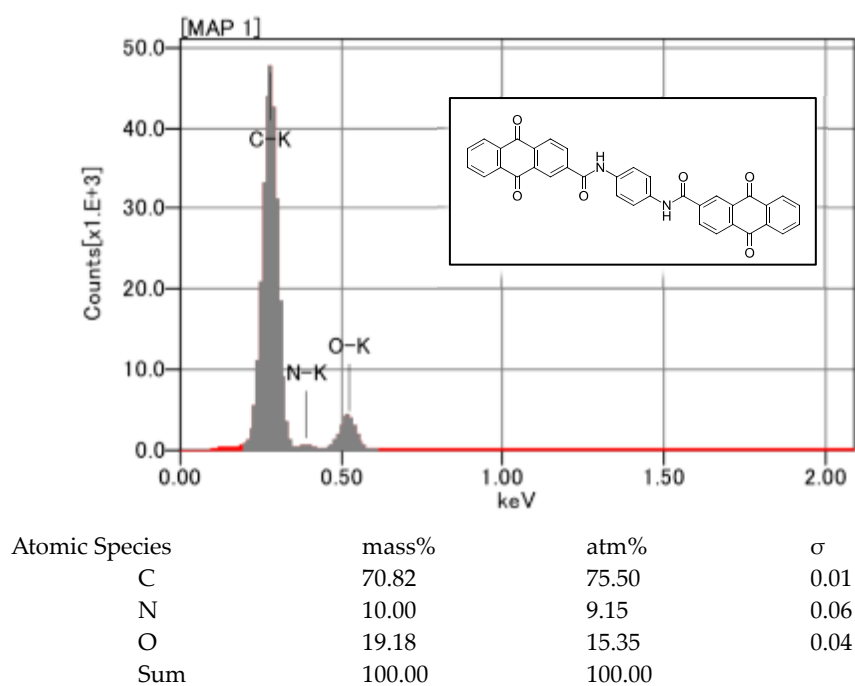

**b**

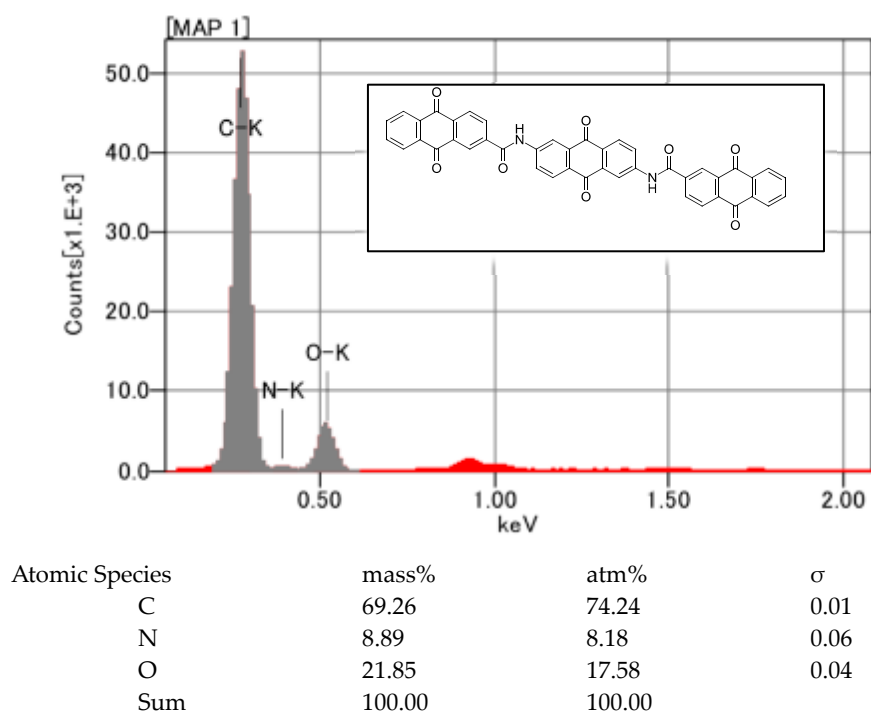

**Figure S3.** EDX spectra for (a) the amide-bonded dimer and (b) amide-bonded trimer.

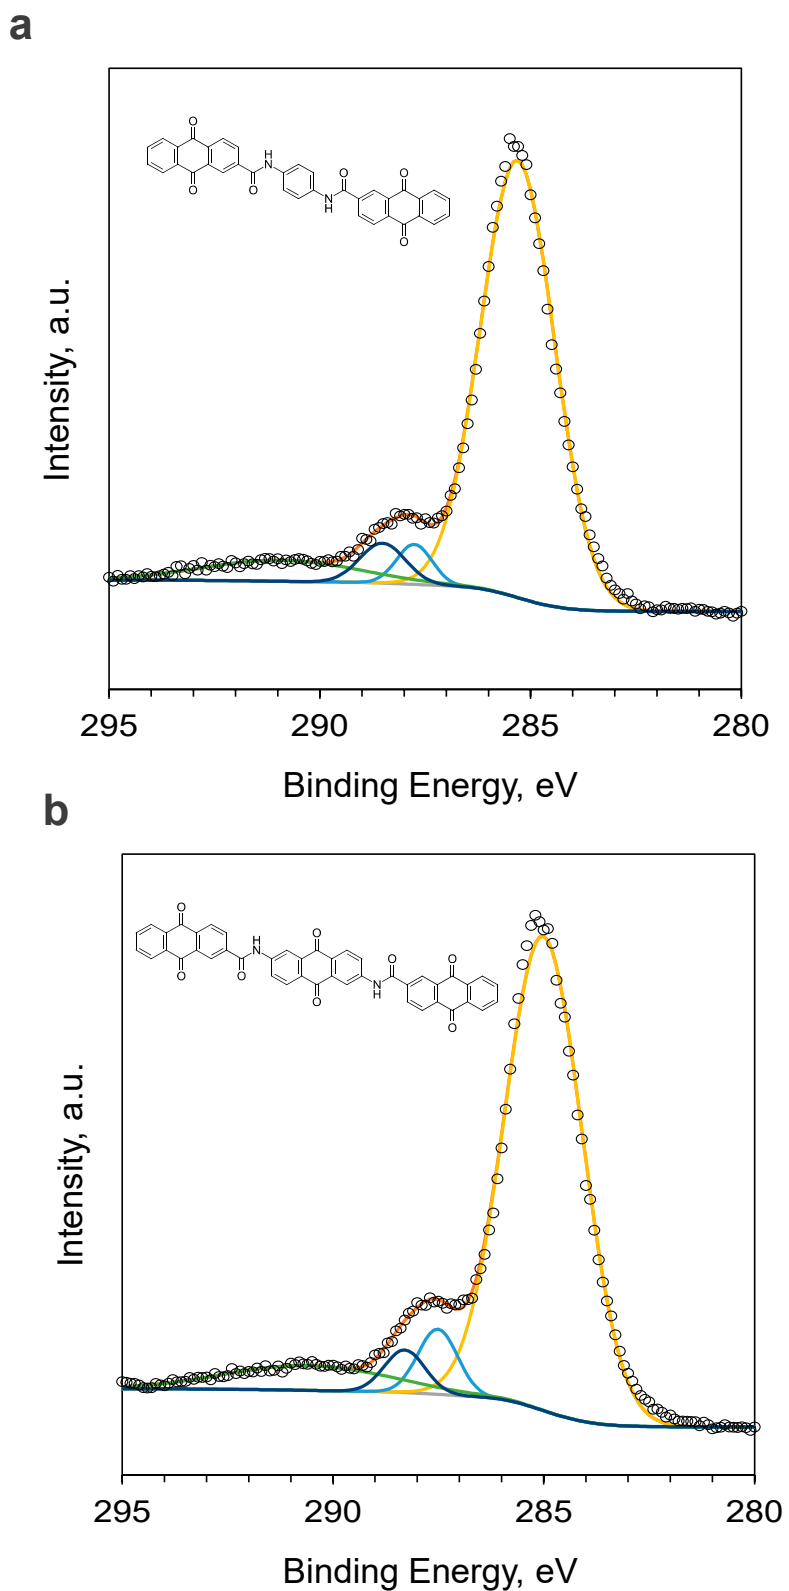

**Figure S4.** XPS spectra of the (a) amide-bonded dimer and (b) amide-bonded trimer. Monochromatic Al K $\alpha$  (1.4866 keV) was used. These C<sub>1s</sub> profiles were decomposed into four peaks and Shirley's background by the curve-fitting software XPSPEAKS 4.1.

**a**

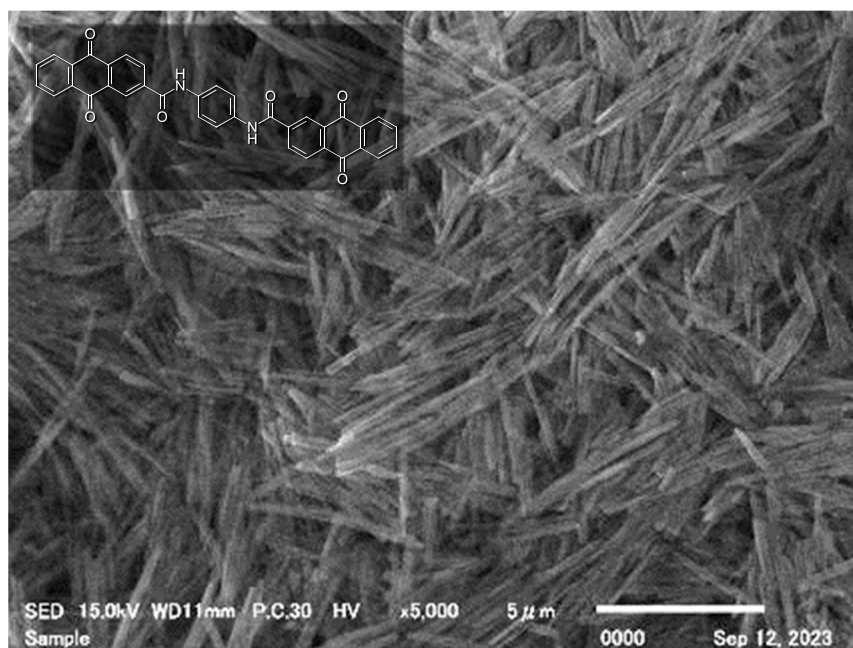

**b**

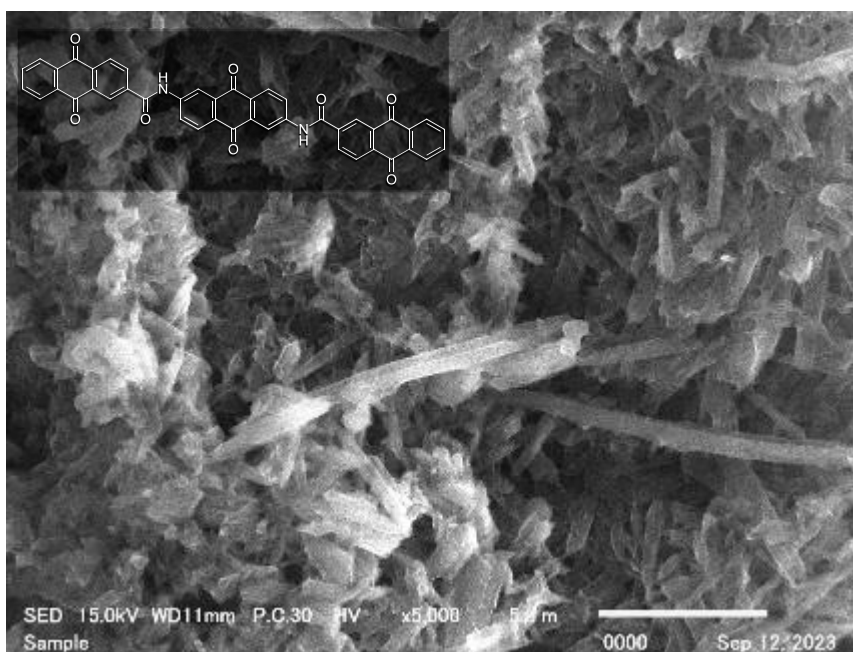

**Figure S5.** SEM images for (a) the amide-bonded dimer and (b) amide-bonded trimer.

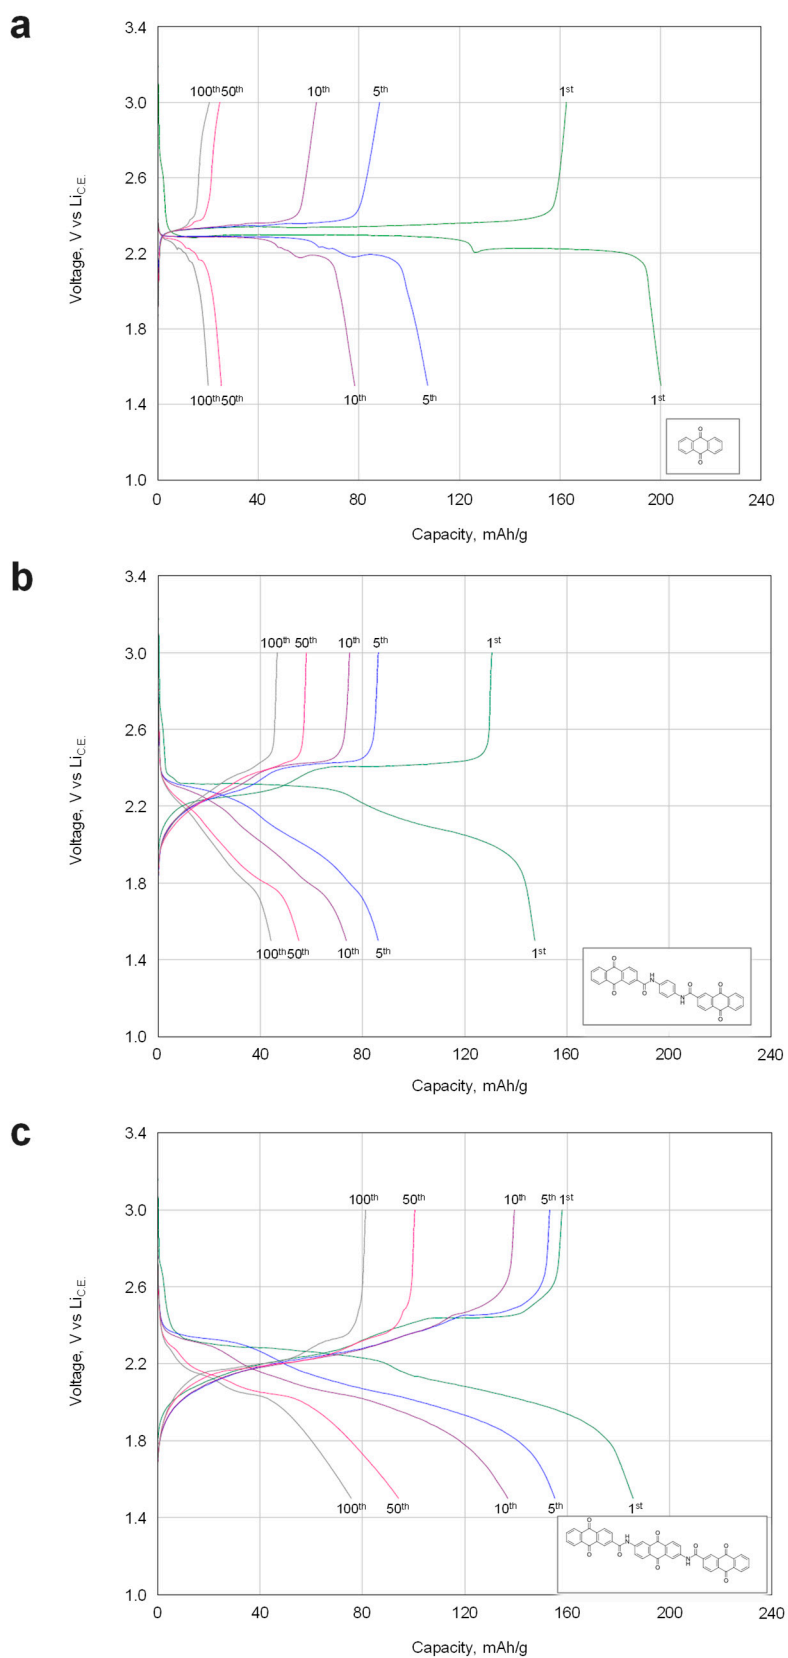

**Figure S6.** Charge/discharge curves of 1<sup>st</sup>, 5<sup>th</sup>, 10<sup>th</sup>, 50<sup>th</sup>, and 100<sup>th</sup> cycles for the electrodes using (a) AQ, (b) AQ amide dimer, and (c) AQ amide trimer at the current density of 40 mA/g.

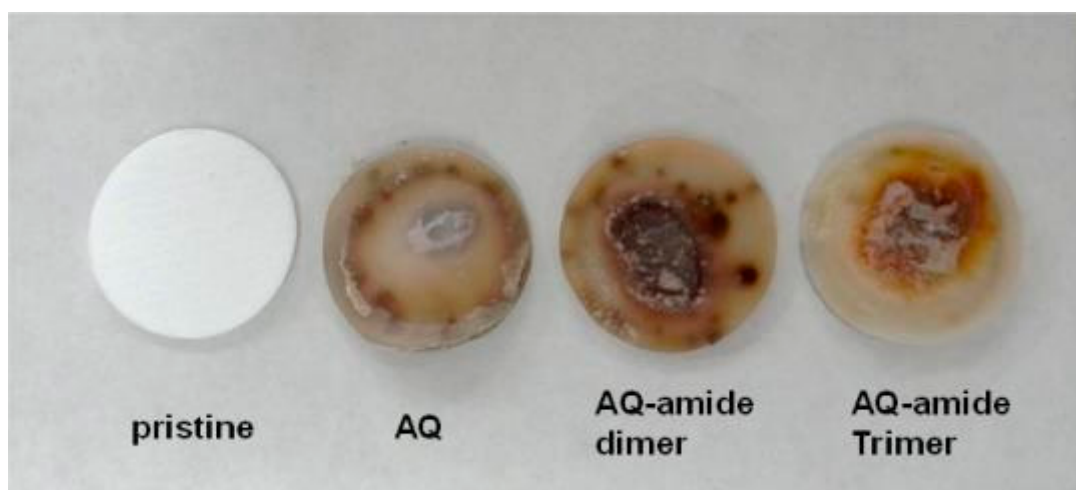

**Figure S7.** Photo images of the separators after 100 cycles.
